# Supplementary material for: Biopolymer-chitosan based supramolecular hydrogels as solid state electrolytes for electrochemical energy storage
Source: Royal Society of Chemistry journal article supplement (doi:10.1039/c6cc08658f), 2017-01-01
Supplement: c6cc08658f1.pdf [file c6cc08658f1.pdf]

### **Supporting Information for**

## **Biopolymer-Chitosan based supramolecular hydrogels as solid state electrolyte for electrochemical energy storage**

*Lujie Cao<sup>ab</sup>, Mingyang Yang<sup>ab</sup>, Dong Wu<sup>a</sup>, Fucong Lyu<sup>a</sup>, Zhifang Sun<sup>a</sup>, Xiongwei Zhong<sup>ab</sup>, Hui Pan<sup>b</sup>, Hongtao Liu<sup>c</sup>, and Zhouguang Lu<sup>a\*</sup>*

Address:

<sup>a</sup> Department of Materials Science & Engineering, South University of Science and Technology of China, Shenzhen, 518000, China

E-mail: luzg@sustc.edu.cn

<sup>b</sup> Institute of Applied Physics and Materials Engineering, University of Macau, Taipa, Macau, China

<sup>c</sup> School of Chemistry and Chemical Engineering  
Central South University, Changsha 410083, Hunan, China

Keywords: Supercapacitor, Li/Na ion battery, Supramolecular hydrogels, Solid state electrolyte, Chitosan

### **Electrochemical characterization**

Electrochemical characterization of the MnO<sub>2</sub>/SHE/KBC asymmetric supercapacitor were carried out by cyclic voltammetry CV, electrochemical impedance spectroscopy EIS and galvanostatic charge-discharge studies. Specific capacitance and charge-discharge efficiency values for the ESs were also obtained from chronopotentiometric data recorded galvanostatically at a current density of 1.8 mA cm<sup>-2</sup> in the potential range between 0 and 1.6 V on a Neware (CT-4008) cycler. The specific capacitances were evaluated from discharge curves of the charge-discharge plots using the equation  $C = 2I\Delta t / (S \Delta V)$ , in which  $I$  is the constant input current and  $\Delta t$  is the time required to change the potential by  $\Delta V$ . The charge-discharge efficiencies  $\eta$  of the ESs were calculated using the equation  $\eta = t_d \times 100 / t_c$ , in which  $t_c$  and  $t_d$  are the respective times required for charging and discharging the electrochemical supercapacitors. All the electrochemical measurements except the temperature dependence of ionic conductivity were conducted at room temperature. The electrochemical impedance spectrum (EIS) were measured on an electrochemical station (VMP3, Bio-Logic). The bulk ionic conductivity of the supramolecular hydrogel electrolytes were determined from the complex impedance spectra in the frequency range between 200 Hz and 1 MHz with a perturbation of 5 mV by using the equation  $\sigma = L/RA$ , in which  $L$ ,  $A$ , and  $R$  are the thickness, area, and bulk resistance calculated from high-frequency intercept on the real impedance axis of the Cole-Cole plot of the MnO<sub>2</sub>/SHE/KBC asymmetric supercapacitor, respectively. In our experiment, the  $L$  is 0.1 cm in thickness and the  $S$  is 1.1 cm<sup>2</sup>. The activation energy  $E_a$  is determined by the equation  $\sigma = \sigma_0 / [KT \exp(-E_a/KT)]$ .

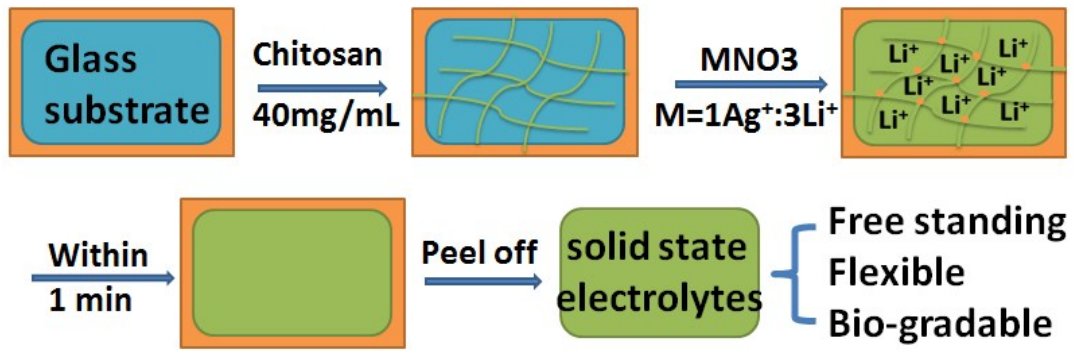

Figure S1 The process of preparation of solid polymer superamolecular hydrogel electrolyte (SHE).

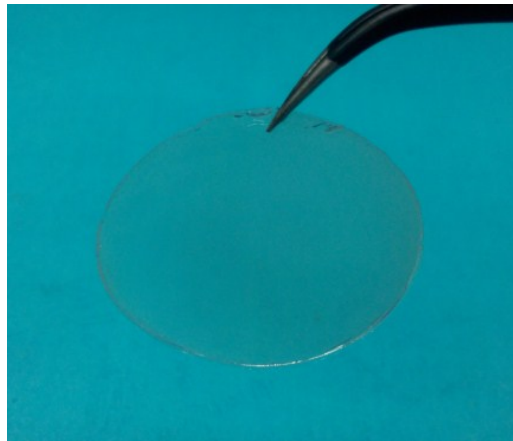

Figure S2 The prepared SHE.

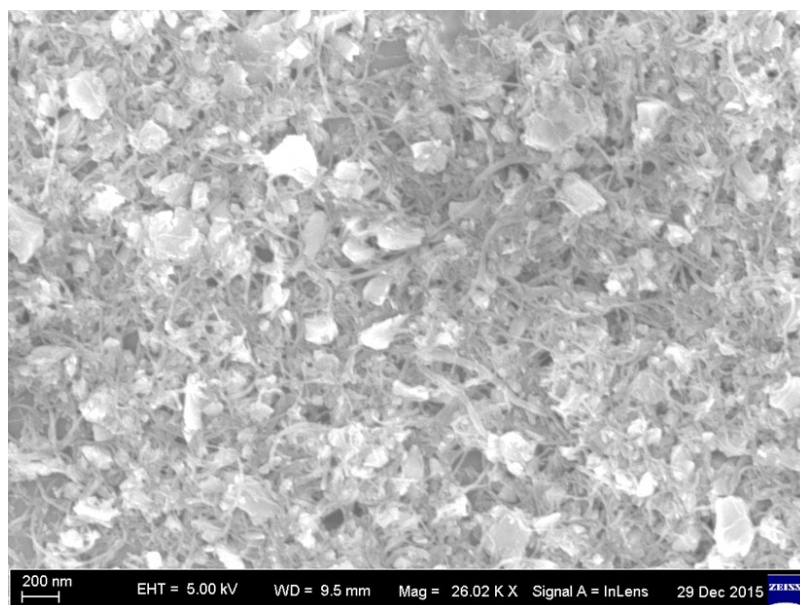

Figure S3 The SEM image of cathode of MnO<sub>2</sub>-CNT composite.

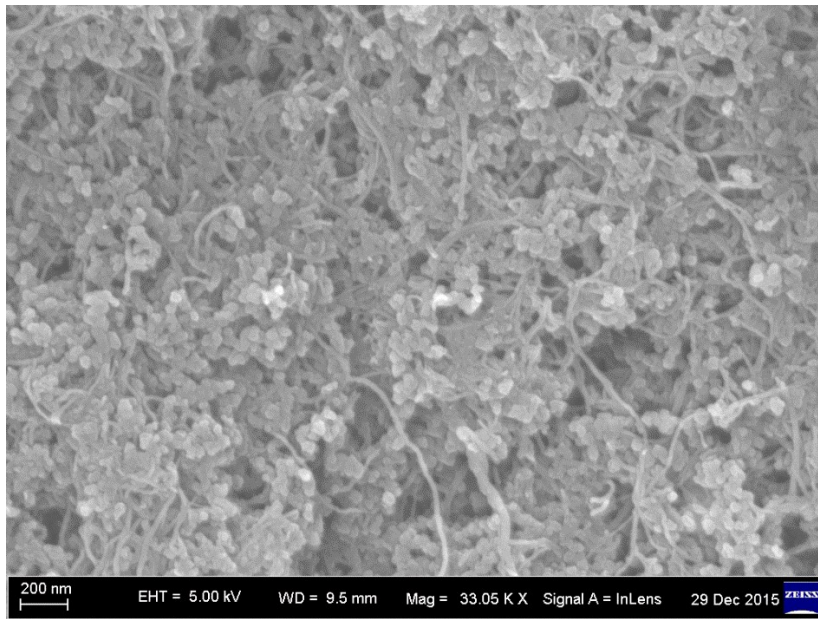

Figure S4 The SEM image of anode of KBC(ketjen black carbon)-CNT composite.

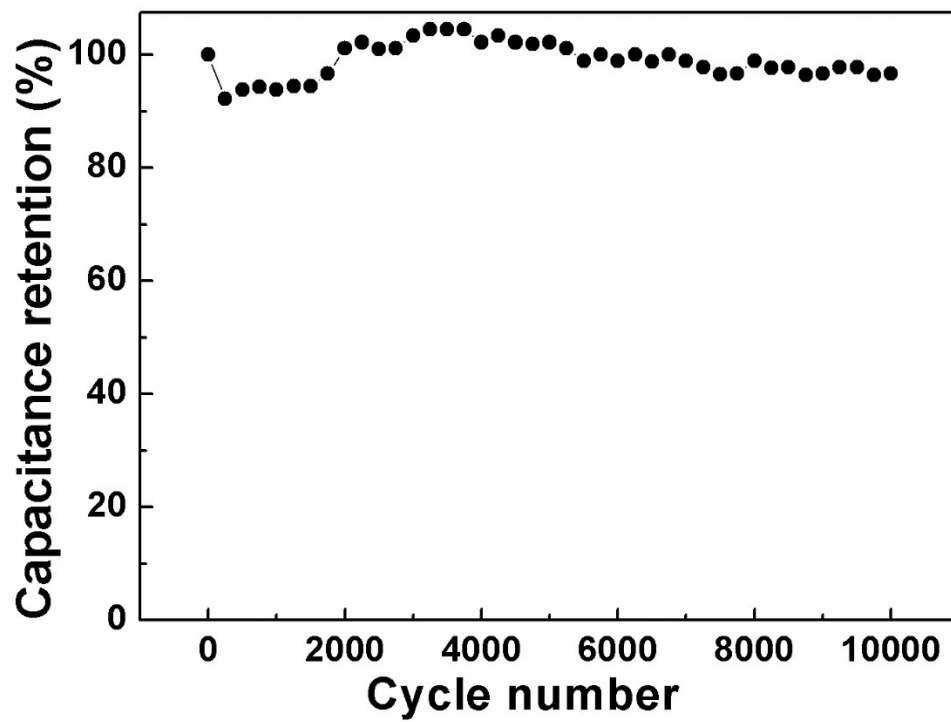

Figure S5 The capacitance retention of MnO<sub>2</sub>/SHE/KBC electrochemical supercapacitor.

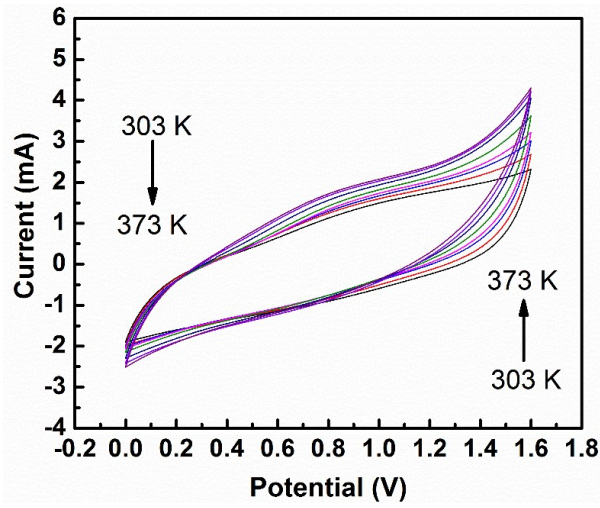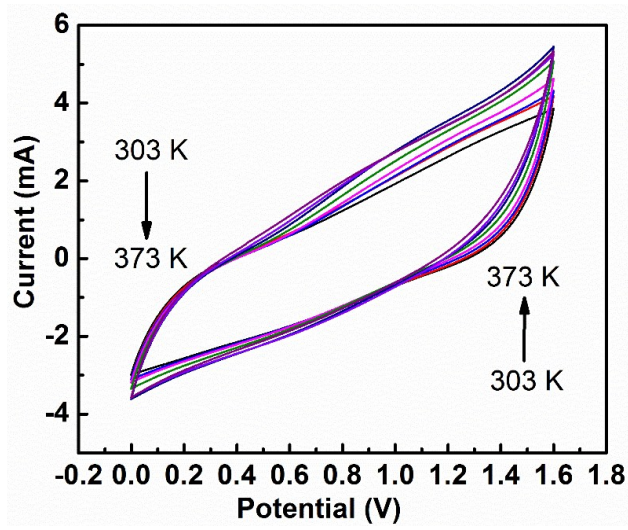

Figure S6 CV curves under different temperature at 100 mV/S (up) and 200 mV/s (down) scan rate.

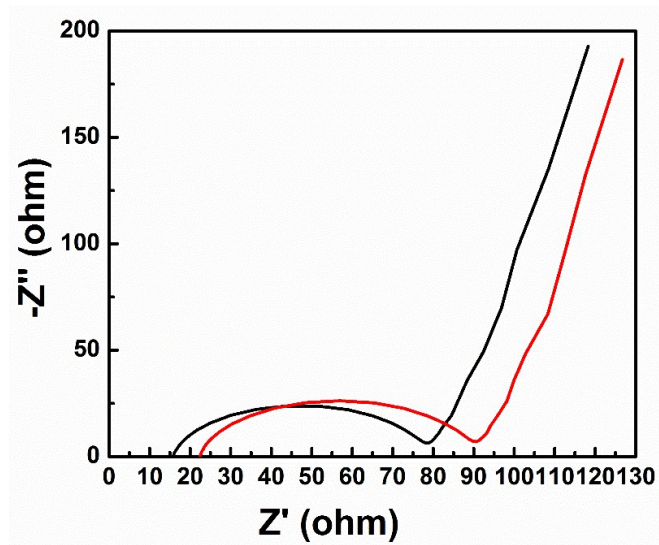

Figure S7 The EIS spectra of  $\text{MnO}_2/\text{SHE}/\text{KBC}$  asymmetric supercapacitor before (black curve) and after (red curve) 10000 charge-discharge cycles at 303 K.



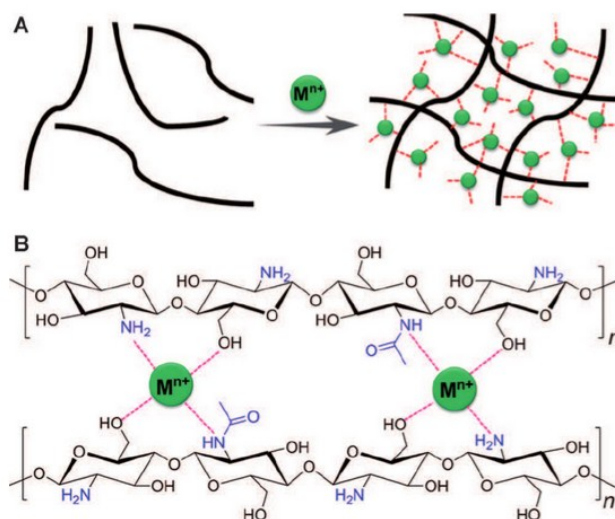

Figure S8 Schematic representation of polymer-network hydrogels cross-linked by ultrafast complexation of metal ions and chitosan chains in water (A). Chemical structures of chitosan and their inter-woven networks driven by the complexation between metal ions and -OH and -NH<sub>2</sub> groups in the chitosan chains (B).

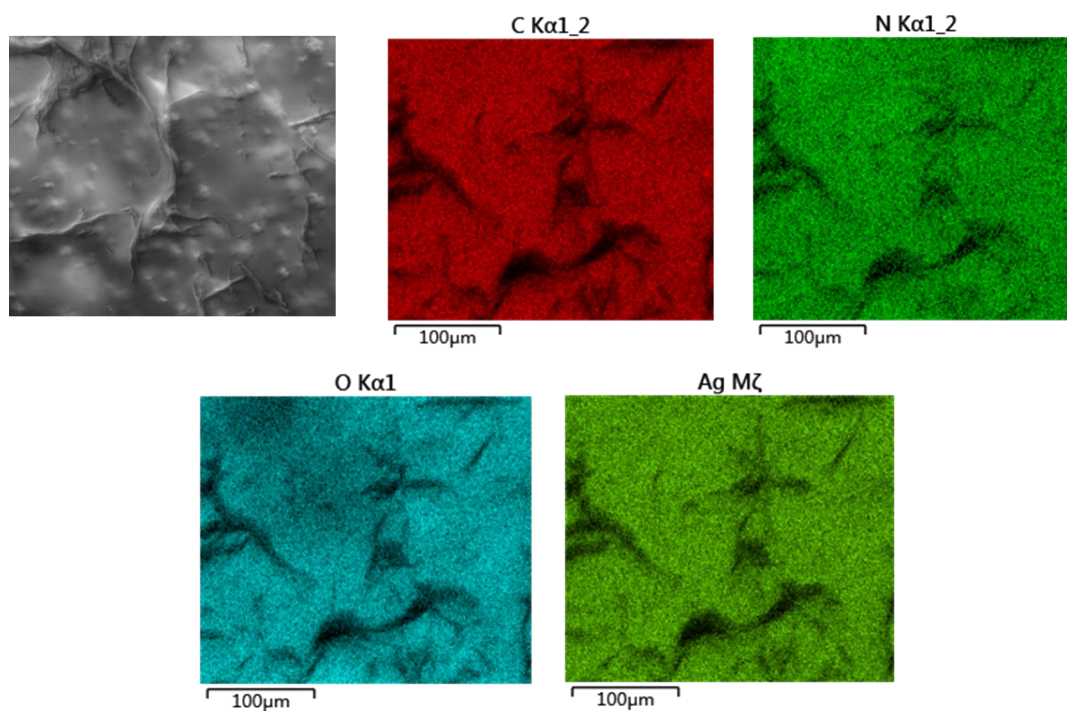

Figure S9 The SEM and EDAX mapping of the dried hydrogel with element C, N, O and Ag.

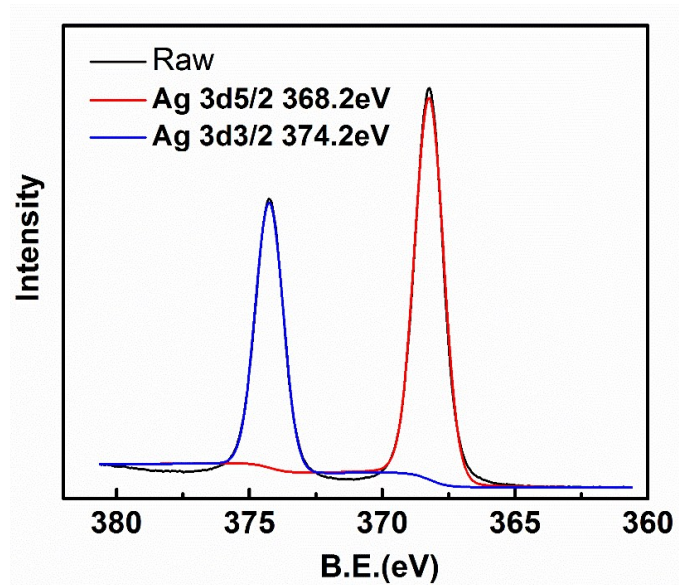

Figure S10 The XPS curve of the dried CS-Ag<sup>+</sup> hydrogel.

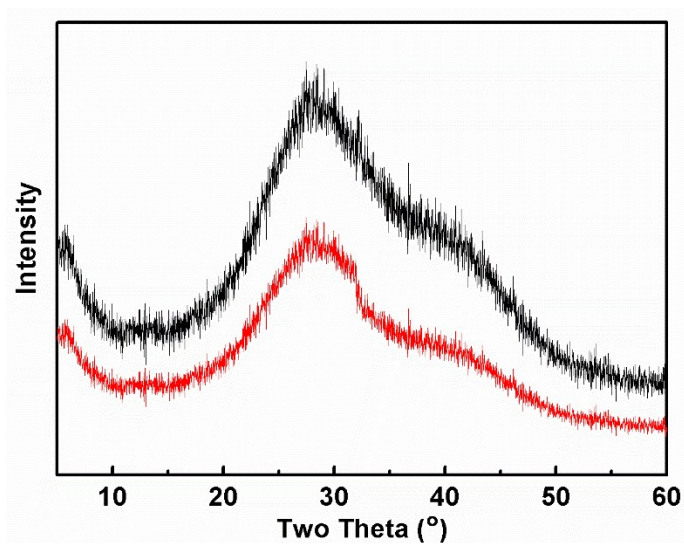

Figure S11 The XRD patterns of hydrogel before and after 10000 charge-discharge cycles.
